1                   **Stage-specific gene and transcript dynamics in**  
2                                   **human male germ cells**

3   Lara M. Siebert-Kuss,<sup>1,6</sup> Henrike Krenz,<sup>2,6</sup> Tobias Tekath,<sup>2</sup> Marius Wöste,<sup>2</sup> Sara Di Persio,<sup>1</sup>  
4   Nicole Terwort,<sup>1</sup> Margot J. Wyrwoll,<sup>3</sup> Jann-Frederik Cremers,<sup>4</sup> Joachim Wistuba,<sup>1</sup> Martin  
5   Dugas,<sup>2,5</sup> Sabine Kliesch,<sup>4</sup> Stefan Schlatt,<sup>1</sup> Frank Tüttelmann,<sup>3</sup> Jörg Gromoll,<sup>1</sup> Nina Neuhaus<sup>1</sup>  
6   and Sandra Laurentino<sup>1,7\*</sup>

7   <sup>1</sup> Centre of Reproductive Medicine and Andrology, Institute of Reproductive and  
8   Regenerative Biology, University of Münster, Münster, Germany.

9   <sup>2</sup> Institute of Medical Informatics, University of Münster, Münster, Germany.

10   <sup>3</sup> Institute of Reproductive Genetics, University of Münster, Münster, Germany.

11   <sup>4</sup> Department of Clinical and Surgical Andrology, Centre of Reproductive Medicine and  
12   Andrology, University Hospital of Münster, Münster, Germany.

13   <sup>5</sup> Institute of Medical Informatics, Heidelberg University Hospital, Heidelberg, Germany.

14   <sup>6</sup> The authors consider that the first two authors should be regarded as joint first authors

15   <sup>7</sup> Lead Contact

16   \* Correspondence: [Sandra.Laurentino@ukmuenster.de](mailto:Sandra.Laurentino@ukmuenster.de)

## 17 **Abstract**

18 Cell differentiation processes are highly dependent on cell stage-specific gene expression,  
19 including timely production of alternatively spliced transcripts. One of the most  
20 transcriptionally rich tissues is the testis, where the process of spermatogenesis, or  
21 generation of male gametes, takes place. To date, germ cell-specific transcriptome dynamics  
22 remain understudied due to limited transcript information emerging from short-read  
23 sequencing technologies. To fully characterize the transcriptional profiles of human male  
24 germ cells and to understand how the human spermatogenic transcriptome is regulated, we  
25 compared whole transcriptomes of men with different types of germ cells missing from their  
26 testis. Specifically, we compared the transcriptomes of testis lacking germ cells (Sertoli cell-  
27 only phenotype; SCO; n=3), with an arrest at the stage of spermatogonia (SPG; n=4),  
28 spermatocytes (SPC; n=3), and round spermatids (SPD; n=3), with the transcriptomes of  
29 testis with normal and complete spermatogenesis (Normal; n=3). We found between 839 and  
30 4,138 differentially expressed genes (DEGs,  $\log_2$  fold change  $\geq 1$ ) per group comparison,  
31 with the most prevalent changes observed between SPG and SPC arrest samples,  
32 corresponding to the entry into meiosis. We detected highly germ cell-type specific marker  
33 genes among the topmost DEGs of each group comparison. Moreover, applying state-of-the-  
34 art bioinformatic analysis we were able to evaluate differential transcript usage (DTU) during  
35 human spermatogenesis and observed between 1,062 and 2,153 genes with alternatively  
36 spliced transcripts per group comparison. Intriguingly, DEGs and DTU genes showed  
37 minimal overlap ( $< 8\%$ ), suggesting that stage-specific splicing is an additional layer of gene  
38 regulation in the germline. By generating the most complete human testicular germ cell  
39 transcriptome to date, we unravel extensive dynamics in gene expression and alternative  
40 splicing during human spermatogenesis.

## 41 **Introduction**

42 Human male germ cell differentiation is a complex process requiring cell type-specific  
43 transcriptome regulation. Disturbances in spermatogenesis causing male infertility range  
44 from maturation arrest at different germ cell stages to complete lack of germ cells, known as  
45 Sertoli cell-only (SCO) phenotype. Although an increasing number of male infertility cases  
46 can be attributed to pathogenic variants in genes involved in spermatogenesis  
47 (Houston *et al.*, 2021), the number of causative pathogenic variants identified so far remains  
48 small (Tüttelmann *et al.*, 2018). The identification and understanding of genetic causes for  
49 male infertility is hindered by the lack of data regarding transcriptomic dynamics during  
50 human spermatogenesis.

51 In order to obtain testicular cell-type specific gene expression profiles, previous studies took  
52 advantage of samples with distinct histological phenotypes of male infertility using samples  
53 matched by cellular composition (Winge *et al.*, 2018) or by performing comparative  
54 microarray analyses of samples differing in the presence of one specific germ cell-type (von  
55 Kopylow *et al.*, 2010; Chalmel *et al.*, 2012; Lecluze *et al.*, 2018). For example, comparing  
56 testicular tissues with SCO and spermatogonial arrest phenotypes, which only differ in the  
57 presence of spermatogonia, von Kopylow *et al.*, (2010) were able to identify transcripts  
58 specifically expressed by spermatogonia. The authors identified the spermatogonial markers  
59 *FGFR3* and *UTF1*, which are currently considered specific markers for different  
60 spermatogonial subpopulations (Guo *et al.*, 2018; Sohni *et al.*, 2019; Di Persio *et al.*, 2021).  
61 Chalmel *et al.* (2012) expanded on this approach by including samples from different  
62 developmental stages and arrest phenotypes, thereby extracting the transcriptional profiles  
63 of additional germ cell types. These studies demonstrated that the comparison of distinct  
64 arrest phenotypes allows the identification of transcripts expressed at specific stages of germ  
65 cell differentiation during normal spermatogenesis (von Kopylow *et al.*, 2010;  
66 Chalmel *et al.*, 2012). Technological developments such as RNA sequencing (RNA-seq) now  
67 enable an unbiased and more comprehensive analysis of the transcriptome. Specifically,

68 single cell RNA-sequencing (scRNA-seq) of human testicular tissues has revolutionized  
69 germ cell-specific RNA profiling by allowing the identification of cell type-specific gene  
70 expression patterns (Guo *et al.*, 2018; Hermann *et al.*, 2018; Wang *et al.*, 2018; Sohni *et al.*,  
71 2019; Di Persio *et al.*, 2021). However, scRNA-seq results in sparser data compared to  
72 conventional bulk RNA-seq and, by sequencing from the poly-A tail of transcripts, generates  
73 limited information on transcriptional isoforms (Tekath and Dugas, 2021). Total RNA-seq  
74 therefore results in the most complete capture of the transcriptome, including all transcripts  
75 obtained through post-transcriptional processing. The testis presents unusual high levels of  
76 these post-transcriptional events, including alternative splicing (AS) (Kan *et al.*, 2005). AS  
77 enables the production of different transcripts and proteins from a single gene, thereby also  
78 constituting a crucial regulatory mechanism for gene expression. For example, storage of  
79 immature mRNAs allows protein synthesis at transcriptionally silent stages of mouse  
80 spermatogenesis (Iguchi *et al.*, 2006; Naro *et al.*, 2017). During human male germ cell  
81 differentiation, AS events have so far been understudied, with the exception of the  
82 association between hormone receptor genes splice site variants and human male infertility  
83 (Song *et al.*, 2002; Bruysters *et al.*, 2008). Knowledge of the changes in isoforms that result  
84 from AS during human spermatogenesis would open a new avenue for identifying so far  
85 unknown causes for male infertility.

86 In this study, we aimed at generating the most complete human testicular germ cell  
87 transcriptome to date. Combining the advantages of scRNA-seq data and total RNA-seq of  
88 distinct pathological phenotypes, and using sophisticated bioinformatic analyses, we unveiled  
89 the transcriptional profiles of male germ cell types and determined the changes in AS  
90 patterns during human male germ cell differentiation.

## 91 **Materials and Methods**

### 92 **Ethical approval**

93 Male infertility patients included in this study underwent surgery for microdissection testicular  
94 sperm extraction (mTESE; n=15) or to rule out a suspected malignant tumor (n=1) at the  
95 Department of Clinical and Surgical Andrology of the Centre of Reproductive Medicine and  
96 Andrology, University Hospital of Münster, Germany. Each patient gave written informed  
97 consent (ethical approval was obtained from the Ethics Committee of the Medical Faculty of  
98 Münster and the State Medical Board no. 2008-090-f-S) and one additional testicular sample  
99 for the purpose of this study was obtained. Tissue proportions were snap-frozen or fixed in  
100 Bouin's solution.

### 101 **Patient selection**

102 In this study, we included testicular biopsies with a homogenous histological phenotype in  
103 both testes from men showing SCO (SCO-1/ M1045, SCO-2/ M911, SCO-3/M1742),  
104 spermatogenic arrests at the spermatogonial (SPG-1/ M1570, SPG-2/ M1575, SPG-3/  
105 M1072, SPG-4/ M2822), spermatocyte (SPC-1/ M1369, SPC-2/ M799, SPC-3/ M921), and  
106 round spermatid stage (SPD-1/ M2227, SPD-2/ M1311, SPD-3/ M1400) (Table I). We  
107 excluded patients with germ cell neoplasia and a history of cryptorchidism as well as acute  
108 infections. For complete representation of the spermatogenic process, samples with  
109 qualitatively and quantitatively normal spermatogenesis were included in this study  
110 (Normal-1/M1544, Normal-2/M2224, Normal-3/M2234) obtained from patients with  
111 obstructive azoospermia, e.g. due to congenital bilateral absence of the *vas deferens*  
112 (CBAVD; Normal-1), anorgasmia (Normal-2) or due to suspected tumor that was not  
113 confirmed (Normal-3). Prior to surgery, all patients underwent physical evaluation, hormonal  
114 analysis of luteinizing hormone (LH), follicle stimulating hormone (FSH), and testosterone  
115 (T), and semen analysis (World Health Organization, 2010). In addition to conventional  
116 karyotyping and screening for azoospermia factor (AZF) deletions, whole exome sequencing

117 (WES) was performed for all patients, except for SPG-4 (who had undergone chemotherapy  
118 because of leukemia) and one with normal spermatogenesis (Normal-3). WES data were  
119 generated within the Male Reproductive Genomics (MERGE) study as previously published  
120 (Wyrwoll *et al.*, 2020) and were screened for variants in 230 candidate genes that have at  
121 least a limited level of evidence for being associated with male infertility according to a recent  
122 review (Houston *et al.*, 2021). We also included a screening in the recently published genes  
123 *ADAD2*, *GCNA*, *MAJIN*, *MSH4*, *MSH5*, *RAD21L1*, *RNF212*, *SHOC1*, *STAG3*, *SYCP2*,  
124 *TERB1*, *TERB2*, and *TRIM71*, which are associated with non-obstructive azoospermia  
125 (Riera-Escamilla *et al.*, 2019; Krausz *et al.*, 2020; Schilit *et al.*, 2020; Hardy *et al.*, 2021;  
126 Salas-Huetos *et al.*, 2021; Torres-Fernández *et al.*, 2021; Wyrwoll *et al.*, 2021). We screened  
127 for rare (minor allele frequency [MAF] in gnomAD database < 0.01), possibly pathogenic  
128 variants (stop-, frameshift-, and splice site variants) with a read depth > 10x, that were  
129 detected in accordance with the reported mode of inheritance.

### 130 **Histological evaluation of the human testicular biopsies**

131 After overnight fixation in Bouin's solution, the tissues were washed in 70% ethanol,  
132 embedded in paraffin, and sectioned at 5 µm. AppiClear (Applichem, Cat# A4632.2500) was  
133 used to dewax the tissue section. The cellular composition of all testicular biopsies (n=16)  
134 was histologically examined on two periodic acid-Schiff (PAS)-stained sections from two  
135 independent biopsies per testis. For PAS staining, the sections were first incubated with 1%  
136 PA (Sigma-Aldrich, Cat# 1.005.240.100) and then in Schiffs reagent (Sigma-Aldrich, Cat#  
137 1.090.330.500). Cell nuclei were counterstained with Mayer's hematoxylin solution (Sigma-  
138 Aldrich, Cat# 1.092.490.500). After washing in tap water and dehydration through increasing  
139 ethanol concentrations and AppiClear, slides were closed with Merckoglas (Sigma-Aldrich,  
140 Cat# 1.039730.001). The slides were scanned using the Precipoint Viewpoint software  
141 (Precipoint, Freising, Germany). The biopsies were evaluated based on the Bergmann and  
142 Kliesch scoring method (Bergmann and Kliesch, 2010), which assigns a score from 0 to 10 to  
143 each patient according to the percentage of tubules containing elongated spermatids.

144 Furthermore, the percentage of the seminiferous tubules with round spermatids,  
145 spermatocytes or spermatogonia as the most advanced germ cell type was assessed, as  
146 well as seminiferous tubules with SCO or hyalinized tubules (tubular shadows) (Table I).

#### 147 **RNA extraction from testicular tissues**

148 We extracted total RNA from snap-frozen testicular tissues from all biopsies using the Direct-  
149 zol™ RNA Microprep kit (Zymo Research, CA, USA) according to manufacturer's protocol.  
150 Quantity and quality of isolated RNA were evaluated using RNA ScreenTape and the  
151 TapeStation Analysis software 3.1.1 (Agilent Technologies, Inc., CA, USA). All samples had  
152 intact ribosomal 18S and 21S bands. Samples with an RNA integrity number (RIN) >3.6 were  
153 included in the analysis (Suntsova *et al.*, 2019).

#### 154 **Library preparation and sequencing**

155 Next-generation sequencing was performed by the service unit Core Facility Genomics of the  
156 medical faculty at the University of Münster. Libraries were prepared according to the  
157 NEBNext Ultra RNA II directional Library Prep kit (New England Biolabs, MA, USA) after  
158 NEBNext rRNA depletion (New England Biolabs, MA, USA). The NextSeq HO Kit (Illumina  
159 Inc., CA, USA) with 150 cycles was used for paired end sequencing on the NextSeq 500  
160 system (Illumina Inc., CA, USA) with ~400 Million single reads per run.

#### 161 **Data processing**

162 We processed the raw sequence data with the nextflow analysis pipeline nf-core/rnaseq 2.0  
163 (Ewels *et al.*, 2020) and annotated the transcripts with GENCODE release 36 genome  
164 annotation based on the GRCh38.p13 genome reference (Frankish *et al.*, 2019). Gene  
165 expression counts were estimated using *Salmon* (Patro *et al.*, 2017).

## 166 **Differential gene expression analysis**

167 All data were analyzed within the R Statistical Environment (RCoreTeam, 2020). We used  
168 DESeq2 (Love *et al.*, 2014) for analyzing differentially expressed genes (DEGs) following the  
169 standard workflow for *Salmon* quantification files. DESeq2 uses a generalized linear model  
170 based on estimated size factors and dispersion to calculate the  $\log_2$  fold changes for each  
171 gene (Love *et al.*, 2014). Annotation was performed using the biomaRt R package  
172 Normalization was performed using DESeq2 with the median of ratios method  
173 (Love *et al.*, 2014). Genes with a total count > 10 were considered for further analysis. DEGs  
174 were calculated for each group comparison, i.e. SCO vs. SPG, SPG vs. SPC, SPC vs. SPD,  
175 and SPD vs. Normal. *P*-values are calculated based on Wald test and adjusted with  
176 Benjamini-Hochberg. Genes with a false discovery rate (FDR) < 0.05 and a  $\log_2$  fold change  
177 (FC)  $\geq 1$  were considered DEGs. Dispersion of samples was visualized using DESeq2's  
178 *PCAPlot* function for the top 500 genes with a total count > 10.

179 To evaluate gene expression of selected genes of interest at single-cell level, we generated  
180 uniform manifold approximation and projection (UMAP) plots (McInnes *et al.*, 2020) based on  
181 our previously published dataset (Di Persio *et al.*, 2021) using the tool Seurat  
182 (Stuart *et al.*, 2019; Hao *et al.*, 2021).

## 183 **Differential transcript usage analysis**

184 For computing differential transcript usage (DTU) we employed the R package DTUrtle  
185 (Tekath and Dugas, 2021), following the vignette workflow for human bulk RNA-seq analysis.  
186 As for the DEG analysis, we annotated the transcripts with GENCODE release 36 genome  
187 annotation. We calculated DTU genes for each group comparison (i.e. SCO vs. SPG, SPG  
188 vs. SPC, SPC vs. SPD, and SPD vs. Normal) with the *run\_drimseq* function. DTUrtle  
189 conducts statistical analyses based on DRIMSeq (Nowicka and Robinson, 2016), i.e. a  
190 likelihood ratio test is used on the estimated transcript proportions and precision parameter  
191 (Tekath and Dugas, 2021). To increase the statistical power of the analysis, we filtered out



192 transcripts with low impact, i.e. less than 5% usage for all samples or a corresponding total  
193 gene expression of less than 5 counts for all samples before the statistical testing. Also, only  
194 genes with at least two high impact transcripts were considered. From the analysis we  
195 obtained genes with an overall significant change in transcript usage as well as the  
196 corresponding transcripts that drive the change in usage in those genes (both with overall  
197 FDR < 0.05).

198 To decrease the number of analyzed transcripts per DTU genes, a post-hoc filtering was  
199 applied, i.e. transcripts whose proportional expression deviated by less than 10% between  
200 samples were excluded. In this study, we decided to only include transcripts, which fulfill the  
201 criterion that all samples of one group must have a higher transcript usage compared to all  
202 samples of the other group.

### 203 **Pathway Analysis**

204 Molecular function of DEGs and DTU genes were assessed via the Ingenuity Pathway  
205 Analysis software (IPA; Qiagen, Hilden, Germany). A Benjamini-Hochberg multiple testing  
206 correction *P*-value (FDR) <0.01 was used as threshold for significant molecular functions in  
207 IPA. We selected the top 20 significant terms for molecular functions.

### 208 **Statistical analysis**

209 Statistical analysis was conducted as described in sections for differential gene expression  
210 analysis, differential transcript usage analysis, and pathway analysis.

## 211 **Results**

### 212 **Clinical characteristics of the study cohort**

213 Hormonal evaluation revealed that patients with normal spermatogenesis had FSH values  
214 within the reference range, whereas most patients with spermatogenic arrests had elevated  
215 FSH levels (Table I). Other than patient SPD-3, who had a low grade XXY mosaicism

216 (47,XXY[2]/46,XY[28]), no patients showed chromosomal abnormalities. By analyzing WES  
217 data of our patients with unknown reasons for infertility, we did not identify any likely high  
218 impact pathogenic variants in known male infertility candidate genes.

### 219 **Testicular phenotypes are recapitulated at RNA level**

220 To obtain whole transcriptome expression profiles, we sequenced total RNA of human  
221 testicular biopsies with SCO, SPG, SPD, as well as normal spermatogenesis (n=16) (Fig.  
222 1A). Prior to sequencing, a careful histological examination (Fig. 1B) ensured that both testes  
223 presented comparable phenotypes, and no sperm was found via mTESE, except in the  
224 normal samples (Table I). Following total RNA-seq, principal component analysis (PCA)  
225 organized the spermatogenic arrest samples in consecutive order (Fig. 1C), mirroring their  
226 sequential spermatogenic phenotypes.

### 227 **Comparative analysis reveals germ cell-specific transcriptional profiles**

228 We aimed at generating germ cell-specific expression profiles to study transcriptional  
229 changes throughout spermatogenesis. To this end we performed differential gene expression  
230 analysis between groups of different cellularity: SCO versus SPG (comparison 1), SPG  
231 versus SPC (comparison 2), SPC versus SPD (comparison 3) and SPD versus normal  
232 (comparison 4). This revealed between 839 and 4,138 DEGs in the four comparisons  
233 calculated (FDR < 0.05 and absolute  $\log_2$  FC  $\geq$  1, Fig. 2). In the SCO versus SPG  
234 comparison, most transcriptional changes were due to the increased expression of 2,073  
235 genes in SPG samples (Fig. 2A, Supplementary Table SI). Co-expression of DEGs among  
236 all samples revealed the level of gene expression remained high in the other groups  
237 containing spermatogonia (SPC, SPD, Normal), indicating that most of these transcripts  
238 originate from the presence of spermatogonia. Indeed, among the highly expressed genes  
239 were well-known spermatogonial genes such as *MAGEA4* and *FGFR3* (Supplementary  
240 Table SII). The most prominent changes in gene expression were found when comparing  
241 SPG with SPC samples (Fig. 2B, Supplementary Table SIII). The 2,886 genes that were high

242 in expression included spermatocyte-specific genes like *AURKA* and *OVOL1*  
243 (Supplementary Table SII). The same genes also showed high expression in SPD and  
244 normal samples and low to absent expression in SPG and SCO. This indicates that these  
245 genes are specific to spermatocytes, rather than the result of gene expression alterations in  
246 other cell types. When comparing SPC with SPD samples we found 2,345 highly expressed  
247 genes in SPD samples (Fig. 2C, Supplementary Table SIV), including spermiogenesis  
248 marker genes *TNP1* and *PRM1* (Supplementary Table SII). These genes also showed higher  
249 expression in normal samples and lower expression in samples lacking spermatids (SPC,  
250 SPG, SCO), in accordance with their spermatid-specific expression pattern. The most subtle  
251 changes in gene expression were detected when comparing SPD with samples showing  
252 normal spermatogenesis (Supplementary table V), in which the presence of elongated  
253 spermatids is the only histological difference. Genes with increased expression in normal  
254 samples (776) showed lower expression levels in the spermatogenic arrest samples (SPD,  
255 SPC, SPG, SCO) (Fig. 2D) and, among others, included genes associated with the sperm  
256 flagellum like *CATSPER3* and *TEKT2* (Supplementary Table SII).

### 257 **Novel germ cell-specific marker genes and their expression at single cell resolution**

258 To identify novel germ cell-specific marker genes, we focused on the top 100 DEGs per  
259 group comparison with elevated expression in SPG, SPC, SPD, and normal samples. After  
260 evaluating the expression of all genes for their germ cell-specificity in our published scRNA-  
261 seq dataset of 3 patients with normal spermatogenesis (Di Persio *et al.*, 2021) (Fig. 3A), we  
262 show 3 genes per group comparison as examples. Accordingly, from the SCO vs SPG  
263 comparison, we selected the *leucine zipper protein 4* gene (*LUZP4*), *testis specific protein Y-*  
264 *linked 4* (*TSPY4*), and *anomalous homeobox* (*ANHX*), which showed increased expression  
265 in SPG samples (Fig. 3B). Importantly, at single cell level, the expression of these genes was  
266 specific for spermatogonia (Fig. 3C). Based on the SPG vs SPC comparison we selected the  
267 *proline rich acidic protein 1* (*PRAP1*), *ferritin heavy chain like 17* (*FTHL17*) and *synaptogyrin*  
268 *4* (*SYNGR4*) (Fig. 3D). The spermatocyte-specific expression of these genes was confirmed

269 in the single cell dataset (Fig. 3E). For SPD samples, genes with high expression were  
270 *proline rich 30 (PRR30)*, *actin like 7A (ACTL7A)*, and *high mobility group box 4 (HMGB4)*  
271 (Fig. 3F). Based on the expression patterns at single cell level, *PRR30*, *ACTL7A* and  
272 *HMGB4* were expressed in early and late spermatids (Fig. 3G). *TP53 target 5 (TP53TG5)*, 3-  
273 *oxoacid CoA-transferase 2 (OXCT2)*, and *hemogen (HEMGN)* were the highest expressed  
274 genes in normal samples in comparison to SPD samples (Fig. 3H), and also at single-cell  
275 level their expression was specific for late spermatids (Fig. 3I).

### 276 **Alternative splicing is uncoupled from gene expression**

277 To study alternative splicing, we performed a DTU analysis between all four group  
278 comparisons. DTU analysis calculates and compares the proportional contributions (referred  
279 to as 'usage') of transcripts to the overall expression of a gene. A gene has a DTU event, i.e.  
280 is a DTU gene, when at least two of its transcripts are differentially used between two  
281 groups. We found between 1,062 and 2,153 DTU genes in each of the four comparisons  
282 (Supplementary Tables SVI-SIX). By comparing DTU genes to DEGs, we found an overlap  
283 of less than 8% in all four comparisons, indicating that the expression of most genes is  
284 regulated either at the pre- or the post-transcriptional level (Fig. 4), and that only few genes  
285 are regulated at these two levels. Furthermore, we found that the proportion of DEGs to  
286 DTUs in all group comparisons was 2:1 (Fig. 4A-C), except for SPD vs Normal, where this  
287 ratio was inversed with more DTU genes than DEGs (Fig. 4D).

### 288 **DEGs and DTU genes are involved in different biological pathways**

289 We used IPA to evaluate the molecular functions of the DEGs and DTU genes at the  
290 different germ cell stages. In line with the small overlap between the DEG and DTU gene  
291 sets, we found minor overlaps between the top 20 significantly enriched molecular functions  
292 of DEGs and DTU genes in all four groups (Fig. 5). Both gene sets contained genes involved  
293 in organization of cytoskeleton/cytoplasm, microtubule dynamics, apoptosis, necrosis, and  
294 segregation of chromosomes. IPA analysis on DEGs highlighted functional enrichment

295 annotations that can be attributed to the most advanced germ cell type in each group  
296 comparison (e.g. development of stem cells, segregation of chromosomes) (Fig. 5A).

297 In comparison to the functional annotations of DEGs, 26% of molecular functions of the DTU  
298 genes overlapped across the four group comparisons (Fig. 5B). Among the overlapping  
299 terms were microtubule dynamics, organization of cytoplasm, and cytoskeleton. More  
300 general biological functions (e.g. RNA metabolism, cell survival) were enriched among the  
301 DTU genes in each group comparison.

### 302 **Stage-specific splicing is an additional layer of gene regulation in the germline**

303 To study alternatively spliced transcripts, we investigated the transcript biotypes of selected  
304 DTU genes. In comparison to the proportional distribution of transcript biotypes annotated in  
305 GENCODE (Frankish *et al.*, 2019) we found that most of the DTU events, regardless of the  
306 group comparison, result in protein coding transcripts (Fig. 6A). In the comparison between  
307 SPD arrest and normal, two protein-coding isoforms of *actin like 6A* (*ACTL6A*) displayed  
308 differential usage (Fig. 6B). While *ACTL6A-202* (ENST00000429709.7) was the predominant  
309 isoform, with an average usage of 52% in SPD samples, normal samples predominantly  
310 used the *ACTL6A-203* isoform (ENST00000450518.6), which has an alternative 5' splice site  
311 (Fig. 6B). In comparison, *spermatogenesis associated 4* (*SPATA4*) also showed a switch in  
312 usage for its protein coding isoforms *SPATA4-201* (ENST00000280191.7) and *SPATA4-203*  
313 (ENST00000515234.1) in the comparison of SPC versus SPD samples (Fig. 6C). SPC  
314 samples showed a significantly decreased usage of *SPATA4-201* and a significantly  
315 increased usage of *SPATA4-203*, whereas SPD samples exclusively used the *SPATA4-201*  
316 isoform (Fig. 6C). These two isoforms use alternative transcriptional start and stop sites. In  
317 contrast to *ACTL6A*, *SPATA4* was also a DEG in this group comparison and had a higher  
318 expression level in SPD samples (Supplementary Fig. S1A and S1B). Intriguingly, the  
319 second largest group of biotypes with DTU events were retained introns (Fig. 6A). For  
320 *synaptonemal complex protein 3* (*SYCP3*), we found a significantly increased usage of the  
321 retained intron isoform *SYCP3-204* (ENST00000478139.1) in SPG samples, whilst SPC

322 samples had an increased usage of the protein coding isoform *SYCP3-202*  
323 (ENST00000392924.2) (Fig. 6D). In this group comparison, *SYCP3* showed increased  
324 expression in SPC samples (Fig. S1C). A switch in usage from coding to non-coding  
325 transcripts was also observed for *marker of proliferation Ki-67 (MKI67)* (Fig. 6E), which did  
326 not show changes in gene expression (Supplementary Fig. S1D). However, the protein  
327 coding isoform *MKI67-202* (ENST00000368654.8) was lower expressed in SPC samples in  
328 comparison to SDP samples. In contrast, the processed transcript isoform *MKI67-205*  
329 (ENST00000484853.1) showed significantly increased usage in SPC samples and  
330 decreased usage in SDP samples.

## 331 **Discussion**

332 The study of expression patterns in testis is developing rapidly, however a complete picture  
333 of the transcriptome of human germ cells remained unexplored. Here, we demonstrate that  
334 the progression of human male germ cell differentiation is accompanied by major transcript  
335 dynamics, including germ cell-type dependent transcription and splicing events. The latter  
336 resulting in stage-specific transcript isoforms. We found that alternative splicing is mainly  
337 uncoupled from the level of gene expression and facilitates a crucial layer of gene regulation  
338 in germ cells, especially in the late stages of spermatogenesis.

339 The differentiation of male germ cells requires cell-specific transcriptional regulation  
340 (Guo *et al.*, 2018; Hermann *et al.*, 2018; Di Persio *et al.*, 2021). Previous bulk microarray  
341 studies demonstrated that the use of homogeneous human testicular tissues with stage-  
342 specific germ cell-arrests allows for the identification of germ cell-specific transcript profiles,  
343 thus allowing the unbiased analysis of germ cell populations in their cognate environment  
344 (von Kopylow *et al.*, 2010; Chalmel *et al.*, 2012). Due to the use of microarrays in previous  
345 studies, the full spectrum of transcriptome profiles, including isoform information, remained  
346 largely unknown.

347 Our systematic analysis of total RNA from testicular biopsies with well-defined, distinct germ  
348 cell compositions revealed significant changes in gene expression (839 to 4,138 DEGs;  
349 Supplementary Tables SI, SIII, SIV, SV). Most changes were detected between samples with  
350 spermatogonial and spermatocyte arrest, indicating that the entry into meiosis results in a  
351 peak of transcriptional activity. Transcripts expressed at this stage are known to be stored for  
352 translation at later differentiation stages (Paronetto and Sette, 2010; Wang *et al.*, 2020).  
353 Among the topmost expressed genes for spermatogonia (2,073), spermatocytes (2,886),  
354 round spermatids (2,345) and elongated spermatids (776), we found highly germ cell-specific  
355 genes, which to our knowledge were not previously associated with the respective germ cell  
356 stages in humans (Supplementary Table SX).

357 The transcriptional output of a gene depends not only on the level of RNA expression but  
358 also on post-transcriptional processing of RNA transcripts, for instance through AS, which  
359 allows a single gene to originate different transcripts and potentially different proteins  
360 (Baralle and Giudice, 2017). Although it is well known that the testis is an organ with high  
361 transcriptome diversity, AS is still understudied in human spermatogenesis. Making use of a  
362 powerful bioinformatic technique, the DTU analysis, we were able to study for the first time  
363 transcriptome dynamics during human spermatogenesis. Several studies observed  
364 discontinuous patterns of transcription throughout murine and human spermatogenesis  
365 (Jan *et al.*, 2017; Vara *et al.*, 2019). In our study, we further characterized the ongoing  
366 transcriptional changes during human spermatogenesis by identifying between 1,062 and  
367 2,153 genes whose transcripts were alternatively spliced at different germ cell stages  
368 (Supplementary Tables SVI, SVII, SVIII, SIX). Our results indicate that alternative splicing  
369 extends the transcriptome diversity in germ cells, which already present high transcriptional  
370 activity, as we found that alternative splicing events are more prevalent between the  
371 premeiotic and meiotic germ cell stages. As we identified more alternatively spliced genes  
372 than changes in gene expression between the spermatid arrest and normal samples, we  
373 hypothesize that in the final stage of spermiogenesis transcriptome diversity arises primarily  
374 from alternative splicing rather than by changes in gene transcription. In line with this idea

375 are studies in mice showing that genes required for spermiogenesis are already expressed at  
376 the beginning of meiosis (da Cruz *et al.*, 2016) and that transcription in elongated spermatids  
377 is decreased due to the highly compacted chromatin structure (Sassone-Corsi, 2002). Even  
378 in the absence of transcriptional activity in the nucleus, stored unprocessed transcripts can  
379 maintain translational activity in late stages of germ cell differentiation (Wang *et al.*, 2020).  
380 Our study demonstrates that alternative splicing is uncoupled from the level of gene  
381 expression during human spermatogenesis, as only a minority of genes were both  
382 differentially expressed and differentially spliced at each respective germ cell stage. Data on  
383 the comparison of DEG and DTU genes in other tissues also revealed that these two gene  
384 sets hardly overlap and different molecular functions are enriched (Solovyeva *et al.*, 2021).  
385 Interestingly, we found that DEGs were enriched for germ cell-specific processes, whereas  
386 DTU genes were involved in more general biological processes, suggesting that during  
387 human spermatogenesis these functions are predominantly regulated at transcriptional and  
388 post-transcriptional level, respectively. We suggest that general processes are uncoupled  
389 from the level of gene expression, as these need to be maintained even in transcriptionally  
390 silent cells such as later germ cells. By looking more precisely into four DTU genes, we  
391 demonstrate the importance of our dataset for further research in the field of male infertility.  
392 For example, we were able to reveal that SPD and normal samples express different protein  
393 coding transcripts of *ACTL6A*, something that would have been overlooked by conventional  
394 DEG analysis. It is also relevant to understand which gene products with potentially different  
395 functionality are produced by AS, as it has been shown that this may play a role in the  
396 etiology of several diseases (Scotti and Swanson, 2016) such as cancer (Wiesner *et al.*,  
397 2015; Vitting-Seerup and Sandelin, 2017). Whether alterations in alternatively spliced  
398 transcript expression also plays a role in the pathology of infertility remains to be assessed.  
399 We showed that some crucial spermatogenic genes such as *SYCP3* appear to be regulated  
400 at both the transcriptional and post-transcriptional levels. *SYCP3* is already expressed as an  
401 immature non-coding transcript in SPG samples, whereas the mature transcript is  
402 predominantly expressed in SPC samples. A previous study indicated that spermatogonia



403 already express genes required for meiosis (Jan *et al.*, 2017), however the mechanism  
404 behind this observation was not addressed. In murine spermatogenesis, intron retention  
405 ensures timely and stage-dependended gene expression (Naro *et al.*, 2017). Our data supports  
406 the hypothesis that the expression of spermatogenic stage-specific genes might be  
407 functionally regulated through alternative splicing by intron retention during human  
408 spermatogenesis. Our data strongly highlights the need to further analyze the splicing  
409 machinery in human germ cells.

410 Our whole transcriptome analysis provides an unbiased evaluation of transcriptome  
411 dynamics during human spermatogenesis for novel and/or germ cell-specific genes. By not  
412 only focusing on protein coding exons but capturing the presence of all alternative transcripts  
413 at different stages of human spermatogenesis, our dataset allows to study the role of non-  
414 coding pathogenic variants, e.g. in splice sites, by pinpointing the expression and splice  
415 isoforms of germ cell-specific transcripts, thereby prospectively improving the genetic  
416 diagnosis of male infertility.

## 417 **Author's roles**

418 Study conception and design: J.G., F.T., N.N. and S.L.; Supervision: N.N., S.L.; Acquisition  
419 and evaluation of clinical data: J.F.C., S.K., F.T.; Lab work: N.T., S.D.P., J.W.; Data and  
420 bioinformatic analyses: L.M.S.-K., H.K., M.W., T.T., M.D.; Exome analyses/ evaluations:  
421 M.J.W., F.T. Writing Original Draft; L.M.S.-K., H.K., S.S, N.N., S.L.; All authors were involved  
422 in editing, read and approved the final version of the manuscript.

## 423 **Acknowledgements**

424 We thank Heidi Kersebom and Elke Kößer for histological evaluation of testicular tissues and  
425 we also thank Sabine Forsthoff for excellent support in endocrinological measurements. We  
426 thank the service unit Core Facility Genomik of the medical faculty from the University of

427 Muenster for performing the next-generation sequencing. Schematic figure 1A was created  
428 with BioRender.com.

## 429 **Funding**

430 This work was funded by the German research foundation (CRU362) (grants to N.N. (NE  
431 2190/3-1, NE 2190/3-2), S.L. (LA 4064/3-2) F.T. (TU 298/4-1, 4-2, 5-1, 5-2, 7-1), J.G. (GR  
432 1547/24-2) and a pilot project to H.K.) and by institutional funding by the CeRA.

## 433 **Conflict of Interest**

434 The authors declare no competing interests.

## 435 **Data availability**

436 The testicular RNA-Seq data of all patients in this study has been deposited in the European  
437 Genome-Phenome Archive and is available under EGAS00001006135.

## 438 **References**

- 439 Baralle FE, Giudice J. Alternative splicing as a regulator of development and tissue identity.  
440 *Nat Rev Mol Cell Biol* 2017;**18**:437–451.
- 441 Bergmann, M., Kliesch, S. *Testicular biopsy and histology*. In: Nieschlag E., Behre H.M., and  
442 Nieschlag S. (eds) *Andrology*. 2010; Springer: Berlin, Heidelberg.
- 443 Bruysters M, Christin-Maitre S, Verhoef-Post M, Sultan C, Auger J, Faugeron I, Larue L,  
444 Lumbroso S, Themmen APN, Bouchard P. A new LH receptor splice mutation  
445 responsible for male hypogonadism with subnormal sperm production in the  
446 propositus, and infertility with regular cycles in an affected sister. *Human*  
447 *Reproduction* 2008;**23**:1917–1923.
- 448 Chalmel F, Lardenois A, Evrard B, Mathieu R, Feig C, Demougin P, Gattiker A, Schulze W,  
449 Jégou B, Kirchhoff C, *et al*. Global human tissue profiling and protein network  
450 analysis reveals distinct levels of transcriptional germline-specificity and identifies  
451 target genes for male infertility. *Human Reproduction* 2012;**27**:3233–3248.
- 452 Cruz I da, Rodríguez-Casuriaga R, Santiñaque FF, Farías J, Curti G, Caprano CA, Folle GA,  
453 Benavente R, Sotelo-Silveira JR, Geisinger A. Transcriptome analysis of highly  
454 purified mouse spermatogenic cell populations: gene expression signatures switch  
455 from meiotic-to postmeiotic-related processes at pachytene stage. *BMC Genomics*  
456 2016;**17**:294.

- 457 Di Persio S, Tekath T, Siebert-Kuss LM, Cremers J-F, Wistuba J, Li X, Meyer zu Hörste G,  
458 Drexler HCA, Wyrwoll MJ, Tüttelmann F, *et al.* Single-cell RNA-seq unravels  
459 alterations of the human spermatogonial stem cell compartment in patients with  
460 impaired spermatogenesis. *Cell Reports Medicine* 2021;**2**:100395.
- 461 Ewels PA, Peltzer A, Fillinger S, Patel H, Alneberg J, Wilm A, Garcia MU, Di Tommaso P,  
462 Nahnsen S. The nf-core framework for community-curated bioinformatics pipelines.  
463 *Nat Biotechnol* 2020;**38**:271–271.
- 464 Frankish A, Diekhans M, Ferreira A-M, Johnson R, Jungreis I, Loveland J, Mudge JM, Sisu  
465 C, Wright J, Armstrong J, *et al.* GENCODE reference annotation for the human and  
466 mouse genomes. *Nucleic Acids Research* 2019;**47**:D766–D773.
- 467 Guo J, Grow EJ, Mlcochova H, Maher GJ, Lindskog C, Nie X, Guo Y, Takei Y, Yun J, Cai L,  
468 *et al.* The adult human testis transcriptional cell atlas. *Cell Res* 2018;**28**:1141–1157.
- 469 Hao Y, Hao S, Andersen-Nissen E, Mauck WM, Zheng S, Butler A, Lee MJ, Wilk AJ, Darby  
470 C, Zager M, *et al.* Integrated analysis of multimodal single-cell data. *Cell*  
471 2021;**184**:3573-3587.e29.
- 472 Hardy JJ, Wyrwoll MJ, Mcfadden W, Malcher A, Rotte N, Pollock NC, Munyoki S, Veroli MV,  
473 Houston BJ, Xavier MJ, *et al.* Variants in GCNA, X-linked germ-cell genome integrity  
474 gene, identified in men with primary spermatogenic failure. *Hum Genet*  
475 2021;**140**:1169–1182.
- 476 Hermann BP, Cheng K, Singh A, Roa-De La Cruz L, Mutoji KN, Chen I-C, Gildersleeve H,  
477 Lehle JD, Mayo M, Westernströer B, *et al.* The mammalian spermatogenesis single-  
478 cell transcriptome, from spermatogonial stem cells to spermatids. *Cell Reports*  
479 2018;**25**:1650-1667.e8.
- 480 Houston BJ, Riera-Escamilla A, Wyrwoll MJ, Salas-Huetos A, Xavier MJ, Nagirnaja L,  
481 Friedrich C, Conrad DF, Aston KI, Krausz C, *et al.* A systematic review of the  
482 validated monogenic causes of human male infertility: 2020 update and a discussion  
483 of emerging gene–disease relationships. *Human Reproduction Update* 2021;**0**:15.

- 484 Iguchi N, Tobias JW, Hecht NB. Expression profiling reveals meiotic male germ cell mRNAs  
485 that are translationally up- and down-regulated. *Proceedings of the National Academy*  
486 *of Sciences* 2006;**103**:7712–7717.
- 487 Jan SZ, Vormer TL, Jongejan A, Röling MD, Silber SJ, Rooij DG de, Hamer G, Repping S,  
488 Pelt AMM. van. Unraveling transcriptome dynamics in human spermatogenesis.  
489 *Development* 2017;**144**:3659–3673.
- 490 Kan Z, Garrett-Engle PW, Johnson JM, Castle JC. Evolutionarily conserved and diverged  
491 alternative splicing events show different expression and functional profiles. *Nucleic*  
492 *Acids Research* 2005;**33**:5659–5666.
- 493 Kopylow K von, Kirchhoff C, Jezek D, Schulze W, Feig C, Primig M, Steinkraus V, Spiess A-  
494 N. Screening for biomarkers of spermatogonia within the human testis: a whole  
495 genome approach. *Human Reproduction* 2010;**25**:1104–1112.
- 496 Krausz C, Riera-Escamilla A, Moreno-Mendoza D, Holleman K, Cioppi F, Algaba F, Pybus  
497 M, Friedrich C, Wyrwoll MJ, Casamonti E, *et al.* Genetic dissection of spermatogenic  
498 arrest through exome analysis: clinical implications for the management of  
499 azoospermic men. *Genet Med* 2020;**22**:1956–1966.
- 500 Lecluze E, Jégou B, Rolland AD, Chalmel F. New transcriptomic tools to understand testis  
501 development and functions. *Molecular and Cellular Endocrinology* 2018;**468**:47–59.
- 502 Love MI, Huber W, Anders S. Moderated estimation of fold change and dispersion for RNA-  
503 seq data with DESeq2. *Genome Biol* 2014;**15**:550.
- 504 McInnes L, Healy J, Melville J. UMAP: Uniform Manifold Approximation and Projection for  
505 dimension reduction. *arXiv:180203426 [cs, stat]* [Internet] 2020;Available from:  
506 <http://arxiv.org/abs/1802.03426>.
- 507 Naro C, Jolly A, Di Persio S, Bielli P, Setterblad N, Alberdi AJ, Vicini E, Geremia R, De la  
508 Grange P, Sette C. An orchestrated intron retention program in meiosis controls  
509 timely usage of transcripts during germ cell differentiation. *Developmental Cell*  
510 2017;**41**:82-93.e4.

- 511 Nowicka M, Robinson MD. DRIMSeq: a Dirichlet-multinomial framework for multivariate  
512 count outcomes in genomics. *F1000Research* 2016;**5**:1–25.
- 513 Paronetto MP, Sette C. Role of RNA-binding proteins in mammalian spermatogenesis: RNA-  
514 binding proteins and germ cells. *International Journal of Andrology* 2010;**33**:2–12.
- 515 Patro R, Duggal G, Love MI, Irizarry RA, Kingsford C. Salmon provides fast and bias-aware  
516 quantification of transcript expression. *Nat Methods* 2017;**14**:417–419.
- 517 RCoreTeam. R: A language and environment for statistical computing. *Vienna, Austria: R*  
518 *Foundation for Statistical Computing* 2020;
- 519 Riera-Escamilla A, Enguita-Marruedo A, Moreno-Mendoza D, Chianese C, Sleddens-Linkels  
520 E, Contini E, Benelli M, Natali A, Colpi GM, Ruiz-Castañe E, *et al.* Sequencing of a  
521 ‘mouse azoospermia’ gene panel in azoospermic men: identification of RNF212 and  
522 STAG3 mutations as novel genetic causes of meiotic arrest. *Human Reproduction*  
523 2019;**34**:978–988.
- 524 Salas-Huetos A, Tüttelmann F, Wyrwoll MJ, Kliesch S, Lopes AM, Goncalves J, Boyden SE,  
525 Wöste M, Hotaling JM, GEMINI Consortium, *et al.* Disruption of human meiotic  
526 telomere complex genes TERB1, TERB2 and MAJIN in men with non-obstructive  
527 azoospermia. *Hum Genet* 2021;**140**:217–227.
- 528 Sassone-Corsi P. Unique chromatin remodeling and transcriptional regulation in  
529 spermatogenesis. *Science* 2002;**296**:2176–2178.
- 530 Schilit SLP, Menon S, Friedrich C, Kammin T, Wilch E, Hanscom C, Jiang S, Kliesch S,  
531 Talkowski ME, Tüttelmann F, *et al.* SYCP2 translocation-mediated dysregulation and  
532 frameshift variants cause human male infertility. *The American Journal of Human*  
533 *Genetics* 2020;**106**:41–57.
- 534 Scotti MM, Swanson MS. RNA mis-splicing in disease. *Nat Rev Genet* 2016;**17**:19–32.
- 535 Sohni A, Tan K, Song H-W, Burow D, Rooij DG de, Laurent L, Hsieh T-C, Rabah R,  
536 Hammoud SS, Vicini E, *et al.* The neonatal and adult human testis defined at the  
537 single-cell level. *Cell Reports* 2019;**26**:1501-1517.e4.

- 538 Solovyeva EM, Ibebunjo C, Utzinger S, Eash JK, Dunbar A, Naumann U, Zhang Y, Serluca  
539 FC, Demirci S, Oberhauser B, *et al.* New insights into molecular changes in skeletal  
540 muscle aging and disease: Differential alternative splicing and senescence.  
541 *Mechanisms of Ageing and Development* 2021;**197**:111510.
- 542 Song GJ, Park Y-S, Lee YS, Lee CC, Kang IS. Alternatively spliced variants of the follicle-  
543 stimulating hormone receptor gene in the testis of infertile men. *Fertility and Sterility*  
544 2002;**77**:499–504.
- 545 Stuart T, Butler A, Hoffman P, Hafemeister C, Papalexi E, Mauck WM, Hao Y, Stoeckius M,  
546 Smibert P, Satija R. Comprehensive integration of single-cell data. *Cell*  
547 2019;**177**:1888-1902.e21.
- 548 Suntsova M, Gaifullin N, Allina D, Reshetun A, Li X, Mendeleeva L, Surin V, Sergeeva A,  
549 Spirin P, Prassolov V, *et al.* Atlas of RNA sequencing profiles for normal human  
550 tissues. *Sci Data* 2019;**6**:36.
- 551 Tekath T, Dugas M. Differential transcript usage analysis of bulk and single-cell RNA-seq  
552 data with DTUrtle. *Bioinformatics* 2021;btab629.
- 553 Torres-Fernández LA, Emich J, Port Y, Mitschka S, Wöste M, Schneider S, Fietz D, Oud MS,  
554 Di Persio S, Neuhaus N, *et al.* TRIM71 deficiency causes germ cell loss during  
555 mouse embryogenesis and is associated with human male infertility. *Front Cell Dev*  
556 *Biol* 2021;**9**:658966.
- 557 Tüttelmann F, Ruckert C, Röpke A. Disorders of spermatogenesis: Perspectives for novel  
558 genetic diagnostics after 20 years of unchanged routine. *medgen* 2018;**30**:12–20.
- 559 Vara C, Paytuví-Gallart A, Cuartero Y, Le Dily F, Garcia F, Salvà-Castro J, Gómez-H L, Julià  
560 E, Moutinho C, Aiese Cigliano R, *et al.* Three-Dimensional Genomic Structure and  
561 Cohesin Occupancy Correlate with Transcriptional Activity during Spermatogenesis.  
562 *Cell Reports* 2019;**28**:352-367.e9.
- 563 Vitting-Seerup K, Sandelin A. The landscape of isoform switches in human cancers. *Mol*  
564 *Cancer Res* 2017;**15**:1206–1220.

- 565 Wang M, Liu X, Chang G, Chen Y, An G, Yan L, Gao S, Xu Y, Cui Y, Dong J, *et al.* Single-  
566 cell RNA sequencing analysis reveals sequential cell fate transition during human  
567 spermatogenesis. *Cell Stem Cell* 2018;**23**:599-614.e4.
- 568 Wang Z-Y, Leushkin E, Liechti A, Ovchinnikova S, Mößinger K, Brüning T, Rummel C,  
569 Grützner F, Cardoso-Moreira M, Janich P, *et al.* Transcriptome and translome co-  
570 evolution in mammals. *Nature* 2020;**588**:642–647.
- 571 Wiesner T, Lee W, Obenauf AC, Ran L, Murali R, Zhang QF, Wong EWP, Hu W, Scott SN,  
572 Shah RH, *et al.* Alternative transcription initiation leads to expression of a novel ALK  
573 isoform in cancer. *Nature* 2015;**526**:453–457.
- 574 Winge SB, Dalgaard MD, Belling KG, Jensen JM, Nielsen JE, Aksglaede L, Schierup MH,  
575 Brunak S, Skakkebaek NE, Juul A, *et al.* Transcriptome analysis of the adult human  
576 Klinefelter testis and cellularity-matched controls reveals disturbed differentiation of  
577 Sertoli- and Leydig cells. *Cell Death Dis* 2018;**9**:586.
- 578 World Health Organization (2010). *WHO Laboratory Manual for the Examination and*  
579 *Processing of Human Semen*. **5th ed.**: World Health Organization.
- 580 Wyrwoll MJ, Temel ŞG, Nagirnaja L, Oud MS, Lopes AM, Heijden GW van der, Heald JS,  
581 Rotte N, Wistuba J, Wöste M, *et al.* Bi-allelic mutations in M1AP are a frequent cause  
582 of meiotic arrest and severely impaired spermatogenesis leading to male infertility.  
583 *The American Journal of Human Genetics* 2020;**107**:342–351.
- 584 Wyrwoll MJ, Walree ES van, Hamer G, Rotte N, Motazacker MM, Meijers-Heijboer H, Alders  
585 M, Meißner A, Kaminsky E, Wöste M, *et al.* Bi-allelic variants in DNA mismatch repair  
586 proteins MutS Homolog *MSH4* and *MSH5* cause infertility in both sexes. *Human*  
587 *Reproduction* 2021;**37**:178–189.



588 **Table 1: Clinical characteristics of the patient groups.**

| Patient groups | Karyotype                                | Histological parameters of tubules |              |              |               |              |               |               | Hormonal parameters (normal range) |              |              | Sperm mTESE      |
|----------------|------------------------------------------|------------------------------------|--------------|--------------|---------------|--------------|---------------|---------------|------------------------------------|--------------|--------------|------------------|
|                |                                          | Score                              | % ES         | % RS         | % SC          | % SG         | % SCO         | % TS          | FSH (1-7U/l)                       | LH (2-10U/l) | T(>12nmol/l) |                  |
| SCO (n=3)      | 46,XY                                    | 0                                  | 0            | 0            | 0             | 0            | 98.7 (± 1.5)  | 1.3 (± 1.5)   | 13.3 (± 4.2)                       | 5.8 (± 2.6)  | 13.7 (± 3.4) | No               |
| SPG (n=4)      | SPG-1, SPG-2, SPG-3: 46,XY; SPG-4: n.d.  | 0                                  | 0            | 0            | 0             | 31.0 (±34.6) | 34.3 (± 20.7) | 35.0 (± 20.6) | 20.4 (± 14.2)                      | 13.4 (± 9.7) | 16.2 (± 6.9) | No               |
| SPC (n=3)      | 46,XY                                    | 0                                  | 0            | 0            | 89.3 (± 11.0) | 4.7 (±4.6)   | 1.0 (± 1.0)   | 5.3 (± 5.5)   | 5.7 (± 1.3)                        | 5.7 (± 4.5)  | 9.9 (± 2.4)  | No               |
| SPD (n=3)      | SPD-1, SPD-2: 46,XY; SPD-3: <sup>a</sup> | 0                                  | 0            | 28.3 (± 2.3) | 59.3 (± 18.0) | 3.0 (±2.0)   | 1.7 (± 2.9)   | 8.7 (± 14.2)  | 7.4 (± 0.9)                        | 3.7 (± 0.5)  | 18.7 (± 5.7) | No               |
| Normal (n=3)   | 46,XY                                    | 8-10                               | 87.3 (± 8.6) | 3.3 (± 2.5)  | 8.7 (± 5.7)   | 0            | 0             | 1.0 (± 1.0)   | 2.5 (± 1.3)                        | 2.6 (± 1.0)  | 24.7 (± 2.2) | Yes <sup>b</sup> |

## 589 **Figure and table legends**

### 590 **Table 1: Clinical characteristics of the patient groups.**

591 Data are presented as mean  $\pm$  standard deviation. Percentage of tubules with elongated  
592 spermatids (%ES), round spermatids (%RS), spermatocytes (%SPC), spermatogonia  
593 (%SPG), Sertoli cell-only phenotype (%SCO), and tubular shadows (%TS). Score refers to  
594 Bergmann and Kliesch score (Bergmann and Kliesch, 2010). Hormonal parameters for  
595 follicle stimulating hormone (FSH), luteinizing hormone (LH) and testosterone (T). <sup>a</sup>Patient  
596 SPD-3 had a low number of XXY karyotype mosaicism (47,XXY[2]/46,XY[28]). <sup>b</sup>TESE  
597 results: N-1 had 100/100 sperm, N-2 had an average of 89/100 sperm; No TESE result  
598 available for N-3 due to consultation to exclude a malignant tumor. SCO – Sertoli cell-only;  
599 SPG – spermatogonial arrest; SPC – spermatocyte arrest; SPD – spermatid arrest; Normal –  
600 normal spermatogenesis; n.d. – not determined.

### 601 **Figure 1: Cellular composition of the human testicular biopsies.**

602 (A) Schematic illustration depicts the cellular composition of the testicular biopsies with  
603 Sertoli cell-only (SCO) arrest at the spermatogonial (SPG), spermatocyte (SPC) and  
604 spermatid (SPD) stage as well as samples with normal spermatogenesis (Normal). (B)  
605 Stacked barplots represent the proportion of round seminiferous tubules and their most  
606 advanced germ cell-type in each sample group. The cellularity of samples from one group is  
607 averaged. (C) A principal component analysis (PCA) plot depicts clustering of the total RNA  
608 sequenced samples based on the top 500 genes.

### 609 **Figure 2: Co-expression of the DEGs among all samples.**

610 (A-D) Heatmaps display the normalized expression counts of the DEGs (rows) of the (A)  
611 SCO vs. SPG, (B) SPG vs. SPC, (C) SPC vs. SPD, and (D) SPD vs. Normal group  
612 comparisons across all samples (columns) scaled via a row Z-score. Red = increased; blue =  
613 decreased.

614 **Figure 3: Examination of germ cell-type specific gene expression at single cell level.**

615 (A) UMAP plot depicts 15,546 cells integrated from three patients with obstructive  
616 azoospermia and normal spermatogenesis. Sertoli cell, spermatogonia, spermatocyte, early  
617 and late spermatid clusters are color-coded, respectively. (B, D, F, H) Vulcano plots of the  
618 increased and decreased genes in samples with (B) spermatogonial arrest, (D)  
619 spermatocyte, (F) and spermatid arrest, as well as in (H) normal spermatogenesis. (C, E, G,  
620 I) Feature plots show the expression of three genes selected for (C) spermatogonia, (E)  
621 spermatocytes, (G) round spermatids, (I) and elongated spermatids at single-cell level.

622 **Figure 4: Comparison of DEG and DTU gene numbers in all four group comparisons.**

623 (A-D) Venn-diagrams display number and proportion of genes that are differentially  
624 expressed, have a DTU event, or both in the (A) SCO vs. SPG, (B) SPG vs. SPC, (C) SPC  
625 vs. SPD, and (D) SPD vs. Normal group comparisons. Yellow = DEGs, blue = DTU genes.

626 **Figure 5: Molecular functions of DEG and DTU genes.**

627 Heatmaps of color-coded  $-\log_{10}$   $p$ -values display the molecular functions of (A) DEGs and  
628 (B) DTU genes per group comparison. Top 20 molecular functions with  $p$ -values  $<0.01$  are  
629 included. (\*) Molecular functions enriched in both, the DEG and DTU gene sets.

630 **Figure 6: Transcript biotypes with DTU events.**

631 (A) Relative amount of different transcript biotypes with DTU events in each of the four group  
632 comparisons in comparison to the transcript biotype annotation from the GENCODE release  
633 36 genome annotation based on the GRCh38.p13 genome reference (Frankish *et al.*, 2019).  
634 (B-E) Schematic illustration of the exons (grey bars) of the transcript isoforms, which  
635 predominantly contribute to the relative change in isoform usage (box plots) in (B) *ACTL6A*,  
636 (C) *SPATA4*, (D) *SYCP3* and (E) *MKI67*.  $P$ -values refer to specific transcripts that  
637 significantly drive the change in isoform usage in genes with an overall significant change in  
638 transcript usage. \* =  $<0.05$ , \*\* =  $<0.01$ , \*\*\* =  $<0.001$

639 **Supplementary figures and tables**

640 **Figure S1: Levels of gene expression for selected DTU genes.** (Related to figure 6).

641 *P*-values: \*\*\* = <0.001

642 **Table SI: List of DEGs of the SCO vs. SPG group comparison.**

643 **Table SII: Well-known germ cell markers and related publications.**

644 **Table SIII: List of DEGs of the SPG vs. SPC group comparison.**

645 **Table SIV: List of DEGs of the SPC vs. SPD group comparison.**

646 **Table SV: List of DEGs of the SPD vs. Normal group comparison.**

647 **Table SVI: List of DTU genes of the SCO vs. SPG group comparison.**

648 **Table SVII: List of DTU genes of the SPG vs. SPC group comparison.**

649 **Table SVIII: List of DTU genes of the SPC vs. SPD group comparison.**

650 **Table SIX: List of DTU genes of the SPD vs. Normal group comparison.**

651 **Table SX: Novel germ cell marker genes and related publications.**

# Figure 1

## A

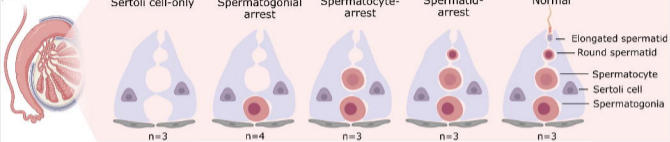

## B

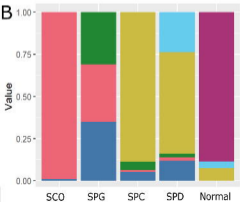

## C

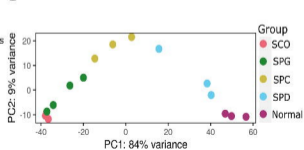

Figure 2

A

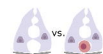

SPG:  
 ▲ 2,073 genes  
 ▼ 328 genes

B

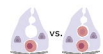

SPC:  
 ▲ 2,886 genes  
 ▼ 1,252 genes

C

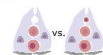

SPD:  
 ▲ 2,345 genes  
 ▼ 169 genes

D

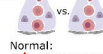

Normal:  
 ▲ 776 genes  
 ▼ 63 genes

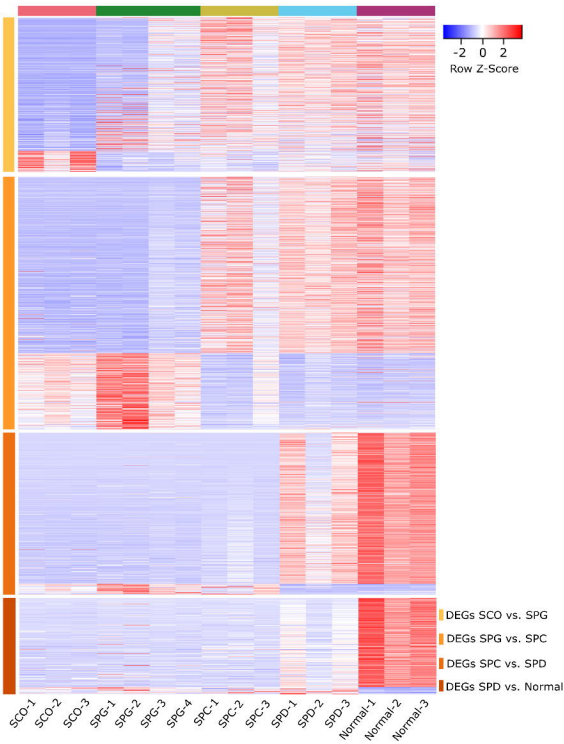

Figure 3

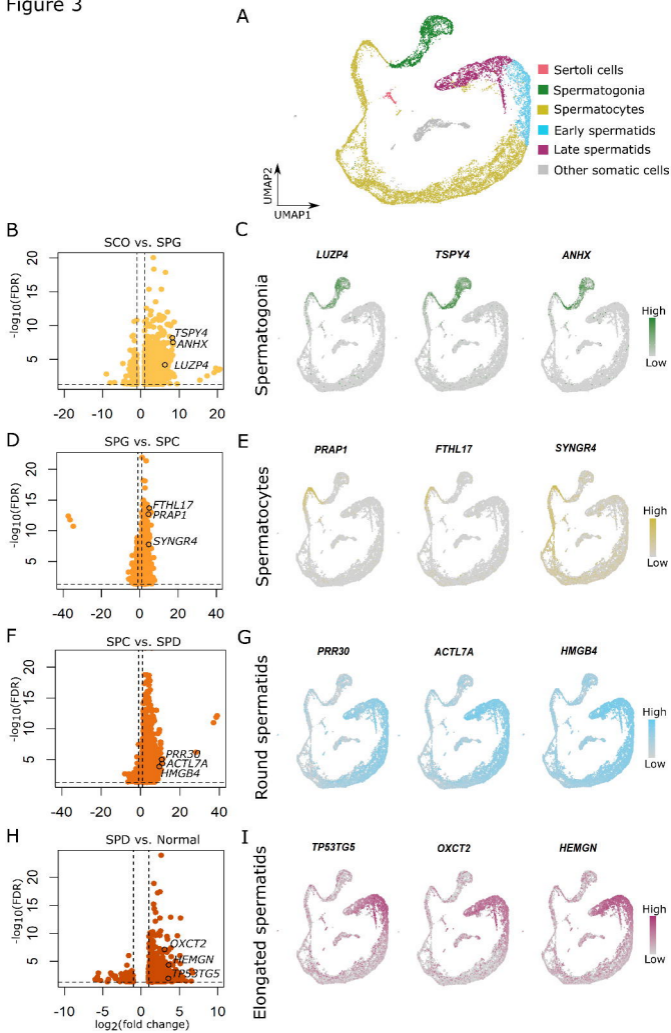

Figure 4

A

SCO vs. SPG

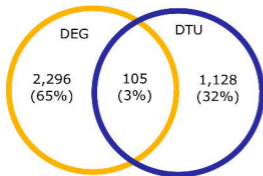

B

SPG vs. SPC

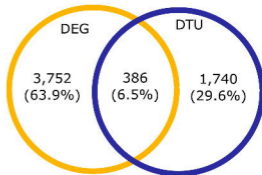

C

SPC vs. SPD

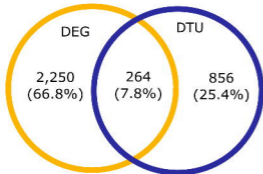

D

SPD vs. Normal

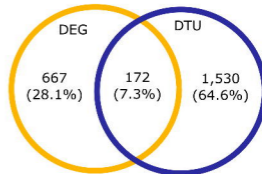



Figure 5

A

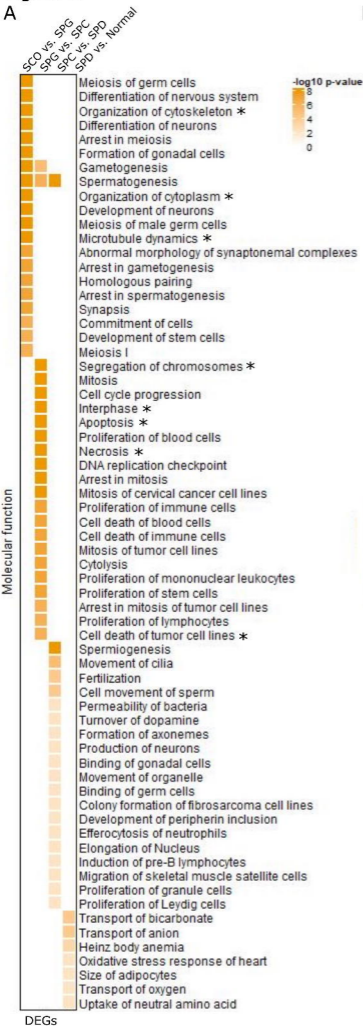

B

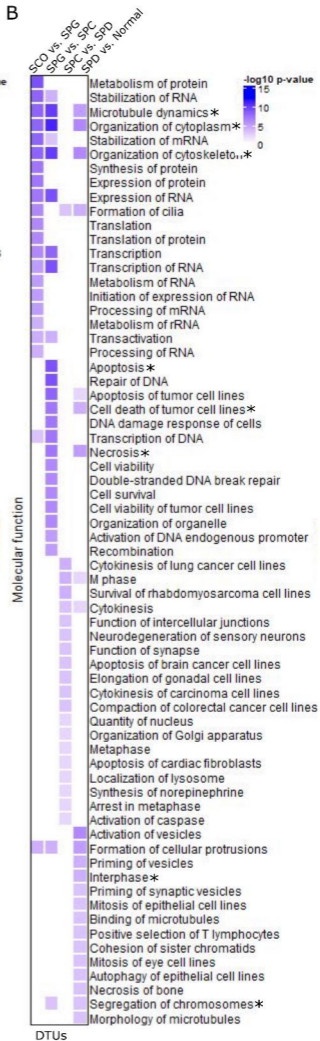

Figure 6

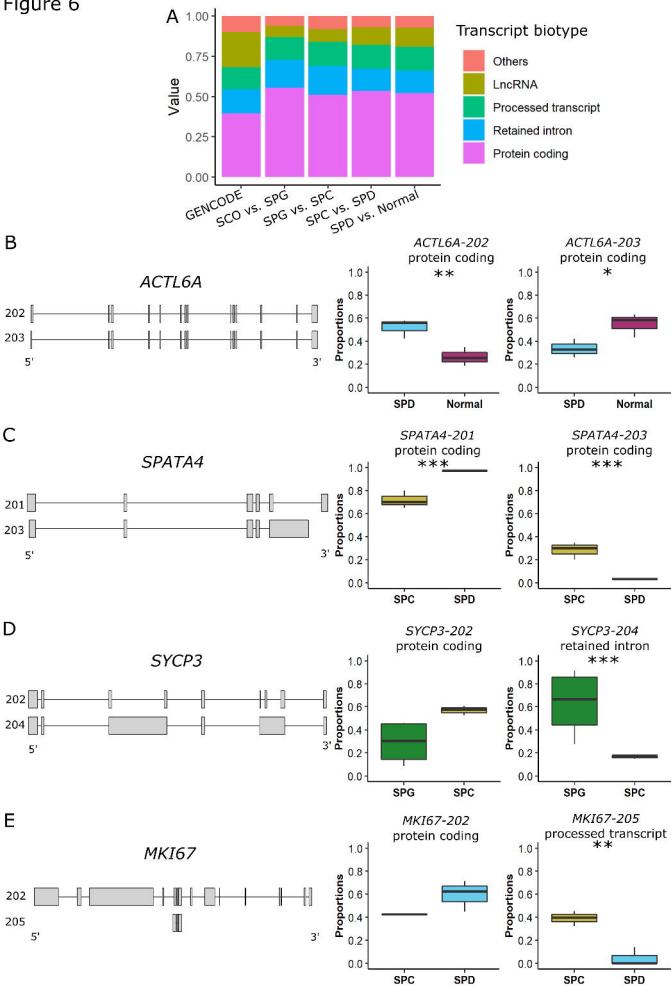

Source: https://www.biorxiv.org/content/biorxiv/early/2022/03/22/2022.03.22.485121.full.pdf
